# Supplementary material for: The development and acceptability of symptom management quality improvement reports based on patient-reported data: an overview of methods used in PROSSES
Source: Springer Nature journal article supplement (doi:10.1007/s11136-016-1305-7), 2016-06-23
Supplement: MOESM1 [file 10682976]

**Supplemental Material Online**

**Figure 2. PROSSES Data Reliability Flow Chart**
